# Supplementary material for: A New Three-Component Photo-Initiating System for Visible Light Recording of Volume Holograms with Single-Pulsed Laser
Source: MDPI journal article supplement (doi:10.3390/polym13203517), 2021-10-13
Supplement: s1 [file s1]

The solvents used were obtained commercially without further purification.

Dibutyltin dilaurate [77-58-7] is available from Merck KGaA, Darmstadt.

Desmodur® N 3900 Product from Covestro Deutschland AG, Leverkusen, Germany, hexane diisocyanate-based polyisocyanate, proportion of imino-oxadiazinedione at least 30%, NCO content: 23.5%.

Fomrez UL 28 Urethanization catalyst, available from Momentive Performance Chemicals, Wilton, Conn., USA.

Aluminum chloride [7446-70-0] is available from Acros Organics, Geel, BE.

1-Chloro-3,4-difluorobenzene [696-02-6] is available from ABCR GmbH & CO. KG, Karlsruhe.

1-Bromo-3,4-difluorobenzene [348-61-8] is available from ABCR GmbH & CO. KG, Karlsruhe.

4-Chlorophenylmagnesium bromide [873-77-8] is available as 0.9 M solution in THF/toluene from Merck KGaA, Darmstadt.

4-Fluorophenylmagnesium bromide [352-13-6] is available as 1.0 M solution in THF from Merck KGaA, Darmstadt.

4-Fluorotrichlorobenzene [402-42-6] is available from ABCR GmbH & CO. KG, Karlsruhe and was used as obtained.

Tetrabutylammonium bromide [1643-19-2] is available from ABCR GmbH & CO. KG, Karlsruhe.

Safranine O [10309-89-4] is available from Chemos GmbH, Germany, Article No. 1308. The composition of the substance mixture is described in [1].

Sodium bis(2-ethylhexyl) [45297-26-5] is available from Merck KGaA, Darmstadt.

Minimized molecular geometry of 2,4,6-tris(chloromethyl)-1,3,5-triazine (TS)

|    |      |              |                |              |
|----|------|--------------|----------------|--------------|
| C  | 6.0  | 5.5207346322 | -8.9955781966  | 5.4292639485 |
| N  | 7.0  | 6.3416876274 | -7.9612632533  | 5.5714553663 |
| C  | 6.0  | 5.9244818403 | -6.8418837550  | 5.0107472629 |
| N  | 7.0  | 4.7691749804 | -6.6881703616  | 4.3777926969 |
| C  | 6.0  | 4.0371907676 | -7.7827250300  | 4.2911384891 |
| N  | 7.0  | 4.3655154751 | -8.9662754402  | 4.7944983317 |
| C  | 6.0  | 6.8662926638 | -5.6294316090  | 5.1228588661 |
| CL | 17.0 | 6.2860330863 | -4.2450712419  | 4.1718395985 |
| CL | 17.0 | 8.4951507951 | -6.0996579711  | 4.5413126331 |
| CL | 17.0 | 6.9596791790 | -5.1647125508  | 6.8561310065 |
| C  | 6.0  | 5.9717213322 | -10.3115936922 | 6.0875656464 |
| C  | 6.0  | 2.6871697788 | -7.7193870598  | 3.5565314030 |
| CL | 17.0 | 2.7582969891 | -8.8590238603  | 2.1700065375 |
| CL | 17.0 | 2.3246994795 | -6.0873583747  | 2.9565318629 |
| CL | 17.0 | 1.3946054490 | -8.2327628868  | 4.6901035273 |
| CL | 17.0 | 6.2174521115 | -10.0076050665 | 7.8397855928 |
| CL | 17.0 | 4.7752092966 | -11.6087043188 | 5.8841639695 |
| CL | 17.0 | 7.5236615162 | -10.8196883314 | 5.3417772612 |

Calculated IR frequencies of 2,4,6- tris(chloromethyl)-1,3,5-triazine (TS)

| MODE | FREQ(CM-1) | SYMMETRY | RED.MASS  | IR-INTENS. |
|------|------------|----------|-----------|------------|
| 1    | 6.850      | A        | 29.944453 | 0.000086   |
| 2    | 0.793      | A        | 29.391869 | 0.000001   |
| 3    | 0.074      | A        | 23.820047 | 0.000000   |
| 4    | 0.050      | A        | 23.819319 | 0.000000   |

|    |          |   |           |          |
|----|----------|---|-----------|----------|
| 5  | 0.290    | A | 24.556584 | 0.000000 |
| 6  | 2.564    | A | 29.877735 | 0.000002 |
| 7  | 7.152    | A | 33.412977 | 0.000090 |
| 8  | 10.999   | A | 34.654833 | 0.000068 |
| 9  | 12.614   | A | 34.671530 | 0.000335 |
| 10 | 57.823   | A | 24.861152 | 0.004928 |
| 11 | 81.266   | A | 30.938242 | 0.000325 |
| 12 | 83.153   | A | 29.340102 | 0.000466 |
| 13 | 90.772   | A | 22.177524 | 0.000072 |
| 14 | 106.571  | A | 20.804885 | 0.000198 |
| 15 | 159.732  | A | 32.179364 | 0.007582 |
| 16 | 164.836  | A | 32.888354 | 0.007195 |
| 17 | 179.311  | A | 33.122246 | 0.007255 |
| 18 | 189.166  | A | 33.713271 | 0.005308 |
| 19 | 210.502  | A | 20.601400 | 0.004171 |
| 20 | 225.490  | A | 20.860317 | 0.000789 |
| 21 | 236.774  | A | 24.367632 | 0.001504 |
| 22 | 265.312  | A | 24.939346 | 0.003646 |
| 23 | 268.558  | A | 28.152989 | 0.000109 |
| 24 | 269.876  | A | 26.364158 | 0.000666 |
| 25 | 288.066  | A | 27.126819 | 0.000736 |
| 26 | 291.663  | A | 25.695036 | 0.000586 |
| 27 | 328.751  | A | 22.303617 | 0.054071 |
| 28 | 348.458  | A | 22.829705 | 0.109879 |
| 29 | 353.167  | A | 23.033817 | 0.064868 |
| 30 | 405.602  | A | 32.672393 | 0.001485 |
| 31 | 427.804  | A | 24.848779 | 0.037945 |
| 32 | 429.795  | A | 24.084217 | 0.007678 |
| 33 | 502.916  | A | 15.118789 | 0.009306 |
| 34 | 639.242  | A | 13.408439 | 0.001928 |
| 35 | 648.241  | A | 13.428399 | 0.005858 |
| 36 | 701.208  | A | 13.260187 | 3.164508 |
| 37 | 703.988  | A | 13.267017 | 3.075483 |
| 38 | 727.717  | A | 13.033935 | 8.792740 |
| 39 | 796.600  | A | 12.694655 | 3.250610 |
| 40 | 801.260  | A | 12.687398 | 2.257302 |
| 41 | 803.138  | A | 12.259370 | 0.074338 |
| 42 | 808.867  | A | 12.222358 | 0.017590 |
| 43 | 832.311  | A | 12.594725 | 0.059997 |
| 44 | 844.251  | A | 12.525594 | 0.207781 |
| 45 | 875.459  | A | 12.627841 | 0.077086 |
| 46 | 1018.912 | A | 13.889923 | 0.044028 |
| 47 | 1019.315 | A | 12.693657 | 0.427347 |
| 48 | 1023.720 | A | 12.697769 | 0.910919 |
| 49 | 1212.454 | A | 12.769472 | 0.033731 |
| 50 | 1362.376 | A | 12.019164 | 0.090443 |
| 51 | 1368.893 | A | 12.553092 | 2.727608 |

|    |          |   |           |          |
|----|----------|---|-----------|----------|
| 52 | 1371.580 | A | 12.549893 | 2.824464 |
| 53 | 1580.580 | A | 12.758427 | 7.577076 |
| 54 | 1583.688 | A | 12.759998 | 6.786063 |

Molecular geometry for energy calculation of Bis-(trichloromethyl)-dichloromethyltriazin

|    |      |              |                |              |
|----|------|--------------|----------------|--------------|
| C  | 6.0  | 5.5207346322 | -8.9955781966  | 5.4292639485 |
| N  | 7.0  | 6.3416876274 | -7.9612632533  | 5.5714553663 |
| C  | 6.0  | 5.9244818403 | -6.8418837550  | 5.0107472629 |
| N  | 7.0  | 4.7691749804 | -6.6881703616  | 4.3777926969 |
| C  | 6.0  | 4.0371907676 | -7.7827250300  | 4.2911384891 |
| N  | 7.0  | 4.3655154751 | -8.9662754402  | 4.7944983317 |
| C  | 6.0  | 6.8662926638 | -5.6294316090  | 5.1228588661 |
| CL | 17.0 | 6.2860330863 | -4.2450712419  | 4.1718395985 |
| CL | 17.0 | 8.4951507951 | -6.0996579711  | 4.5413126331 |
| CL | 17.0 | 6.9596791790 | -5.1647125508  | 6.8561310065 |
| C  | 6.0  | 5.9717213322 | -10.3115936922 | 6.0875656464 |
| C  | 6.0  | 2.6871697788 | -7.7193870598  | 3.5565314030 |
| CL | 17.0 | 2.7582969891 | -8.8590238603  | 2.1700065375 |
| CL | 17.0 | 2.3246994795 | -6.0873583747  | 2.9565318629 |
| CL | 17.0 | 1.3946054490 | -8.2327628868  | 4.6901035273 |
| CL | 17.0 | 6.2174521115 | -10.0076050665 | 7.8397855928 |
| CL | 17.0 | 4.7752092966 | -11.6087043188 | 5.8841639695 |

Minimized molecular geometry of 2-(4'-methoxyphenyl)-4,6-bis(trichloromethyl)-1,3,5-triazine (TA)

|    |      |               |               |               |
|----|------|---------------|---------------|---------------|
| N  | 7.0  | -4.2456334460 | -1.6804640728 | -0.1374739666 |
| C  | 6.0  | -4.1697603114 | -2.9797721468 | 0.0334018400  |
| N  | 7.0  | -3.0731435436 | -3.6703306392 | 0.3224139424  |
| C  | 6.0  | -1.9839841861 | -2.9195933742 | 0.4180878415  |
| N  | 7.0  | -1.9295759718 | -1.6133468114 | 0.2915154262  |
| C  | 6.0  | -3.0950041538 | -0.9973352204 | 0.0221491905  |
| C  | 6.0  | -5.4811533698 | -3.7848156211 | -0.0492272805 |
| C  | 6.0  | -0.6711061810 | -3.6434117218 | 0.7752851895  |
| CL | 17.0 | -6.1168956619 | -3.9060269212 | 1.6383183801  |
| CL | 17.0 | -6.6931555767 | -2.9725258749 | -1.0735660224 |
| CL | 17.0 | -5.1977121185 | -5.4273601905 | -0.6876783590 |
| CL | 17.0 | -0.6795659703 | -5.3360900350 | 0.2145135498  |
| CL | 17.0 | -0.5412884038 | -3.6165980235 | 2.5770953008  |
| CL | 17.0 | 0.7445170051  | -2.8137343253 | 0.0728509391  |
| C  | 6.0  | -3.1163088682 | 0.4546658490  | -0.0992032505 |
| C  | 6.0  | -4.3219260520 | 1.1369979220  | -0.3418519973 |
| C  | 6.0  | -4.3464977719 | 2.5097242438  | -0.4376412246 |
| C  | 6.0  | -3.1614845688 | 3.2492078422  | -0.2945142819 |
| C  | 6.0  | -1.9526052643 | 2.5827393961  | -0.0597279518 |
| C  | 6.0  | -1.9399697927 | 1.2019220055  | 0.0365213354  |
| O  | 8.0  | -3.2858754317 | 4.5845564726  | -0.3965948160 |
| C  | 6.0  | -2.1269238550 | 5.4112762110  | -0.2507034673 |

|   |     |               |              |               |
|---|-----|---------------|--------------|---------------|
| H | 1.0 | -5.2365757079 | 0.5728532990 | -0.4500620163 |
| H | 1.0 | -5.2722302148 | 3.0384475060 | -0.6215313082 |
| H | 1.0 | -1.0290798142 | 3.1305361918 | 0.0481905768  |
| H | 1.0 | -1.0066049508 | 0.6899743159 | 0.2201613643  |
| H | 1.0 | -2.4803161574 | 6.4346587377 | -0.3482344452 |
| H | 1.0 | -1.6707404937 | 5.2810622297 | 0.7320555776  |
| H | 1.0 | -1.3949151671 | 5.2065567558 | -1.0342520662 |

Calculated IR frequencies of 2-(4'-methoxyphenyl)-4,6-bis(trichloromethyl)-1,3,5-triazine (TA)

| MODE | FREQ(CM-1) | SYMMETRY | RED.MASS  | IR-INTENS. |
|------|------------|----------|-----------|------------|
| 1    | 6.092      | A        | 8.506642  | 0.005359   |
| 2    | 0.256      | A        | 14.594415 | 0.000017   |
| 3    | 0.220      | A        | 14.398388 | 0.000007   |
| 4    | 0.132      | A        | 14.546540 | 0.000005   |
| 5    | 4.155      | A        | 13.425066 | 0.003395   |
| 6    | 6.380      | A        | 20.804044 | 0.002416   |
| 7    | 8.128      | A        | 28.081294 | 0.000168   |
| 8    | 10.609     | A        | 33.042080 | 0.000688   |
| 9    | 37.215     | A        | 6.393367  | 0.007371   |
| 10   | 44.358     | A        | 3.720589  | 0.021022   |
| 11   | 53.605     | A        | 8.925706  | 0.008749   |
| 12   | 73.005     | A        | 10.041629 | 0.008957   |
| 13   | 84.267     | A        | 14.275989 | 0.003262   |
| 14   | 103.070    | A        | 12.044485 | 0.011052   |
| 15   | 108.039    | A        | 5.149697  | 0.031229   |
| 16   | 162.061    | A        | 5.913439  | 0.021938   |
| 17   | 163.496    | A        | 8.879519  | 0.016461   |
| 18   | 172.311    | A        | 16.832664 | 0.014811   |
| 19   | 183.501    | A        | 11.689808 | 0.010612   |
| 20   | 196.574    | A        | 10.409842 | 0.001579   |
| 21   | 221.098    | A        | 15.144598 | 0.022358   |
| 22   | 225.977    | A        | 2.619729  | 0.002186   |
| 23   | 235.287    | A        | 2.038560  | 0.011268   |
| 24   | 264.489    | A        | 6.579556  | 0.017340   |
| 25   | 268.054    | A        | 24.063516 | 0.000762   |
| 26   | 285.755    | A        | 9.053452  | 0.025777   |
| 27   | 290.662    | A        | 22.631232 | 0.001648   |
| 28   | 301.055    | A        | 10.855245 | 0.000874   |
| 29   | 344.150    | A        | 7.575400  | 0.079375   |
| 30   | 360.968    | A        | 14.173211 | 0.046780   |
| 31   | 372.993    | A        | 11.647504 | 0.090303   |
| 32   | 412.862    | A        | 23.250152 | 0.022674   |
| 33   | 429.013    | A        | 3.051121  | 0.000188   |
| 34   | 431.053    | A        | 17.088230 | 0.024361   |
| 35   | 486.850    | A        | 4.750002  | 0.066165   |
| 36   | 526.455    | A        | 2.680949  | 0.394532   |

|    |          |   |           |           |
|----|----------|---|-----------|-----------|
| 37 | 549.254  | A | 8.478188  | 0.171773  |
| 38 | 604.962  | A | 6.351794  | 1.469085  |
| 39 | 636.190  | A | 13.317218 | 0.037568  |
| 40 | 645.936  | A | 7.190564  | 0.126996  |
| 41 | 672.918  | A | 7.141379  | 1.941389  |
| 42 | 708.207  | A | 13.054775 | 2.454218  |
| 43 | 736.642  | A | 4.888665  | 2.287486  |
| 44 | 748.299  | A | 8.553153  | 2.602260  |
| 45 | 791.716  | A | 5.915760  | 2.459348  |
| 46 | 799.180  | A | 11.964951 | 0.330920  |
| 47 | 802.254  | A | 10.934840 | 2.368592  |
| 48 | 820.823  | A | 6.586027  | 0.214901  |
| 49 | 824.437  | A | 12.326703 | 1.062632  |
| 50 | 836.082  | A | 1.280896  | 0.018162  |
| 51 | 860.653  | A | 3.470121  | 0.295590  |
| 52 | 883.390  | A | 2.761859  | 0.370519  |
| 53 | 927.312  | A | 9.659187  | 0.797791  |
| 54 | 1000.211 | A | 1.375409  | 0.006569  |
| 55 | 1011.016 | A | 1.593450  | 0.260891  |
| 56 | 1011.880 | A | 4.714446  | 1.134296  |
| 57 | 1019.400 | A | 12.093378 | 0.383676  |
| 58 | 1021.298 | A | 2.804890  | 0.030119  |
| 59 | 1033.375 | A | 7.657611  | 1.830434  |
| 60 | 1141.378 | A | 1.330807  | 0.246376  |
| 61 | 1153.420 | A | 3.594054  | 1.030856  |
| 62 | 1161.359 | A | 1.275765  | 0.028037  |
| 63 | 1196.787 | A | 5.034592  | 0.685037  |
| 64 | 1200.261 | A | 1.360549  | 0.599220  |
| 65 | 1202.439 | A | 1.479849  | 3.586653  |
| 66 | 1298.938 | A | 4.571299  | 9.034142  |
| 67 | 1325.897 | A | 2.004818  | 1.357346  |
| 68 | 1337.135 | A | 2.691091  | 3.826989  |
| 69 | 1351.915 | A | 11.526264 | 2.496184  |
| 70 | 1390.789 | A | 9.209121  | 1.669896  |
| 71 | 1427.607 | A | 4.513341  | 15.832303 |
| 72 | 1458.743 | A | 3.440268  | 1.200251  |
| 73 | 1472.170 | A | 1.243220  | 0.227125  |
| 74 | 1498.151 | A | 1.053325  | 0.244932  |
| 75 | 1502.821 | A | 1.063160  | 0.786547  |
| 76 | 1534.827 | A | 9.903341  | 6.963679  |
| 77 | 1552.563 | A | 2.977071  | 0.269821  |
| 78 | 1592.236 | A | 10.133098 | 26.266429 |
| 79 | 1601.407 | A | 6.821858  | 0.896043  |
| 80 | 1649.818 | A | 6.094598  | 2.471316  |
| 81 | 3023.102 | A | 1.032405  | 1.301220  |
| 82 | 3090.022 | A | 1.106940  | 0.588713  |
| 83 | 3136.064 | A | 1.101400  | 0.407323  |

|    |          |   |          |          |
|----|----------|---|----------|----------|
| 84 | 3189.009 | A | 1.089504 | 0.072395 |
| 85 | 3204.835 | A | 1.087849 | 0.022376 |
| 86 | 3213.486 | A | 1.092953 | 0.054387 |
| 87 | 3219.745 | A | 1.093153 | 0.197138 |

Molecular geometry for energy calculation of 2-(4'-methoxyphenyl)-4-(trichloromethyl)-6-(dichloromethyl)-1,3,5-triazine (TA)

|    |      |               |               |               |
|----|------|---------------|---------------|---------------|
| N  | 7.0  | -4.2456334460 | -1.6804640728 | -0.1374739666 |
| C  | 6.0  | -4.1697603114 | -2.9797721468 | 0.0334018400  |
| N  | 7.0  | -3.0731435436 | -3.6703306392 | 0.3224139424  |
| C  | 6.0  | -1.9839841861 | -2.9195933742 | 0.4180878415  |
| N  | 7.0  | -1.9295759718 | -1.6133468114 | 0.2915154262  |
| C  | 6.0  | -3.0950041538 | -0.9973352204 | 0.0221491905  |
| C  | 6.0  | -5.4811533698 | -3.7848156211 | -0.0492272805 |
| C  | 6.0  | -0.6711061810 | -3.6434117218 | 0.7752851895  |
| CL | 17.0 | -6.1168956619 | -3.9060269212 | 1.6383183801  |
| CL | 17.0 | -6.6931555767 | -2.9725258749 | -1.0735660224 |
| CL | 17.0 | -5.1977121185 | -5.4273601905 | -0.6876783590 |
| CL | 17.0 | -0.6795659703 | -5.3360900350 | 0.2145135498  |
| CL | 17.0 | 0.7445170051  | -2.8137343253 | 0.0728509391  |
| C  | 6.0  | -3.1163088682 | 0.4546658490  | -0.0992032505 |
| C  | 6.0  | -4.3219260520 | 1.1369979220  | -0.3418519973 |
| C  | 6.0  | -4.3464977719 | 2.5097242438  | -0.4376412246 |
| C  | 6.0  | -3.1614845688 | 3.2492078422  | -0.2945142819 |
| C  | 6.0  | -1.9526052643 | 2.5827393961  | -0.0597279518 |
| C  | 6.0  | -1.9399697927 | 1.2019220055  | 0.0365213354  |
| O  | 8.0  | -3.2858754317 | 4.5845564726  | -0.3965948160 |
| C  | 6.0  | -2.1269238550 | 5.4112762110  | -0.2507034673 |
| H  | 1.0  | -5.2365757079 | 0.5728532990  | -0.4500620163 |
| H  | 1.0  | -5.2722302148 | 3.0384475060  | -0.6215313082 |
| H  | 1.0  | -1.0290798142 | 3.1305361918  | 0.0481905768  |
| H  | 1.0  | -1.0066049508 | 0.6899743159  | 0.2201613643  |
| H  | 1.0  | -2.4803161574 | 6.4346587377  | -0.3482344452 |
| H  | 1.0  | -1.6707404937 | 5.2810622297  | 0.7320555776  |
| H  | 1.0  | -1.3949151671 | 5.2065567558  | -1.0342520662 |

#### 4-Fluorotrichlorobenzene

Minimized molecular geometry of 4-fluorotrichlorobenzene

|   |     |              |               |              |
|---|-----|--------------|---------------|--------------|
| C | 6.0 | 5.5217064763 | -8.9998191971 | 5.4390955842 |
| C | 6.0 | 5.7195605997 | -7.6332625242 | 5.5299360715 |
| C | 6.0 | 6.0780590759 | -6.8860587322 | 4.4013651086 |
| C | 6.0 | 6.2329456145 | -7.5328704897 | 3.1781326734 |
| C | 6.0 | 6.0374960104 | -8.9063470072 | 3.0729848426 |
| C | 6.0 | 5.6863868091 | -9.6098480037 | 4.2060617446 |
| C | 6.0 | 6.2701609461 | -5.3945314890 | 4.5615488137 |

|    |      |              |                |              |
|----|------|--------------|----------------|--------------|
| CL | 17.0 | 6.7862412383 | -4.5615490022  | 3.0588814470 |
| CL | 17.0 | 7.5260936529 | -5.0477510295  | 5.8258955637 |
| CL | 17.0 | 4.7203000162 | -4.6161303355  | 5.1048468929 |
| F  | 9.0  | 5.4976966065 | -10.9457723356 | 4.1155545599 |
| H  | 1.0  | 5.2490850156 | -9.5863012910  | 6.3054483257 |
| H  | 1.0  | 5.5918525015 | -7.1502339785  | 6.4884245850 |
| H  | 1.0  | 6.5035963756 | -6.9781312879  | 2.2941477536 |
| H  | 1.0  | 6.1584720614 | -9.4154692966  | 2.1268210336 |

Calculated IR frequencies of 4-fluorotrichlorobenzene

| MODE | FREQ (CM <sup>-1</sup> ) | SYMMETRY | RED.-MASS | IR-INTENS. |
|------|--------------------------|----------|-----------|------------|
| 1    | 0.121                    | A        | 14.129935 | 0.000005   |
| 2    | 0.060                    | A        | 14.132532 | 0.000000   |
| 3    | 0.051                    | A        | 14.135112 | 0.000000   |
| 4    | 7.429                    | A        | 15.788030 | 0.000429   |
| 5    | 11.143                   | A        | 12.901268 | 0.000657   |
| 6    | 14.996                   | A        | 29.995824 | 0.000395   |
| 7    | 41.794                   | A        | 3.920800  | 0.000948   |
| 8    | 83.045                   | A        | 13.330007 | 0.008182   |
| 9    | 153.445                  | A        | 16.448099 | 0.014036   |
| 10   | 195.754                  | A        | 12.677340 | 0.026503   |
| 11   | 234.111                  | A        | 14.639163 | 0.032765   |
| 12   | 243.588                  | A        | 16.049013 | 0.010481   |
| 13   | 268.429                  | A        | 20.010641 | 0.023741   |
| 14   | 332.867                  | A        | 15.615227 | 0.189257   |
| 15   | 388.936                  | A        | 7.314933  | 0.088205   |
| 16   | 390.792                  | A        | 27.923634 | 0.002729   |
| 17   | 428.096                  | A        | 3.095175  | 0.002442   |
| 18   | 433.955                  | A        | 5.262011  | 0.008354   |
| 19   | 538.374                  | A        | 2.795228  | 0.008859   |
| 20   | 563.767                  | A        | 9.933239  | 1.135019   |
| 21   | 647.705                  | A        | 7.375820  | 0.154148   |
| 22   | 687.174                  | A        | 5.353110  | 3.293787   |
| 23   | 758.567                  | A        | 4.499816  | 1.608925   |
| 24   | 771.185                  | A        | 10.360561 | 2.612146   |
| 25   | 813.504                  | A        | 7.361408  | 0.167971   |
| 26   | 833.736                  | A        | 1.244343  | 0.011153   |
| 27   | 871.360                  | A        | 1.719030  | 0.538411   |
| 28   | 886.847                  | A        | 7.231825  | 1.566180   |
| 29   | 976.518                  | A        | 1.354620  | 0.027106   |
| 30   | 992.449                  | A        | 1.349556  | 0.000370   |
| 31   | 1037.814                 | A        | 2.589539  | 0.103451   |
| 32   | 1139.236                 | A        | 1.290495  | 0.051292   |
| 33   | 1188.782                 | A        | 1.333660  | 2.038203   |
| 34   | 1199.544                 | A        | 4.124721  | 0.929261   |
| 35   | 1255.402                 | A        | 3.164673  | 2.270271   |
| 36   | 1330.660                 | A        | 4.094191  | 0.162569   |

|    |          |   |          |          |
|----|----------|---|----------|----------|
| 37 | 1336.534 | A | 1.610162 | 0.075217 |
| 38 | 1444.370 | A | 3.167461 | 0.195515 |
| 39 | 1544.161 | A | 2.407651 | 1.945249 |
| 40 | 1635.907 | A | 6.863408 | 0.242441 |
| 41 | 1646.474 | A | 5.813267 | 1.603593 |
| 42 | 3194.941 | A | 1.088728 | 0.041180 |
| 43 | 3200.169 | A | 1.091305 | 0.022229 |
| 44 | 3207.920 | A | 1.095183 | 0.009681 |
| 45 | 3229.938 | A | 1.091627 | 0.011653 |

Molecular geometry for energy calculation of 4-fluorodichlorobenzene radical

|    |      |              |                |              |
|----|------|--------------|----------------|--------------|
| C  | 6.0  | 5.5217064763 | -8.9998191971  | 5.4390955842 |
| C  | 6.0  | 5.7195605997 | -7.6332625242  | 5.5299360715 |
| C  | 6.0  | 6.0780590759 | -6.8860587322  | 4.4013651086 |
| C  | 6.0  | 6.2329456145 | -7.5328704897  | 3.1781326734 |
| C  | 6.0  | 6.0374960104 | -8.9063470072  | 3.0729848426 |
| C  | 6.0  | 5.6863868091 | -9.6098480037  | 4.2060617446 |
| C  | 6.0  | 6.2701609461 | -5.3945314890  | 4.5615488137 |
| CL | 17.0 | 6.7862412383 | -4.5615490022  | 3.0588814470 |
| CL | 17.0 | 7.5260936529 | -5.0477510295  | 5.8258955637 |
| F  | 9.0  | 5.4976966065 | -10.9457723356 | 4.1155545599 |
| H  | 1.0  | 5.2490850156 | -9.5863012910  | 6.3054483257 |
| H  | 1.0  | 5.5918525015 | -7.1502339785  | 6.4884245850 |
| H  | 1.0  | 6.5035963756 | -6.9781312879  | 2.2941477536 |
| H  | 1.0  | 6.1584720614 | -9.4154692966  | 2.1268210336 |

#### Preparation of 1,2,4-trifluoro-5-(trichloromethyl) benzene 2

In a 250 mL four-necked round-bottom flask equipped with reflux condenser, dropping funnel, internal thermometer and mechanical stirrer, 20.7 g of aluminum trichloride were suspended in 75 mL of carbon tetrachloride under nitrogen. This suspension was admixed with 10.2 g of 1,2,4-trifluorobenzene in a gradual manner, such that the reaction mixture was refluxing gently. The resultant HCl gas was introduced into aqueous sodium hydroxide solution. On completion of the addition the mixture was subsequently stirred for 10 min and then cooled down to room temperature. The reaction mixture was discharged onto 300 mL of ice-water and the organic phase was separated off. The organic phase was washed once with 100 mL of water, once with 100 mL of 5% NaHCO<sub>3</sub> solution and a further time with 100 mL of water. The carbon tetrachloride was distilled off and the desired product (5.6 g) crystallized out of the oil in the form of colorless fine needles.

<sup>1</sup>H NMR (400 MHz, CDCl<sub>3</sub>) δ 8.02 – 7.90 (m, 1H), 6.95 – 6.84 (m, 1H).  
m.p.: 118°C



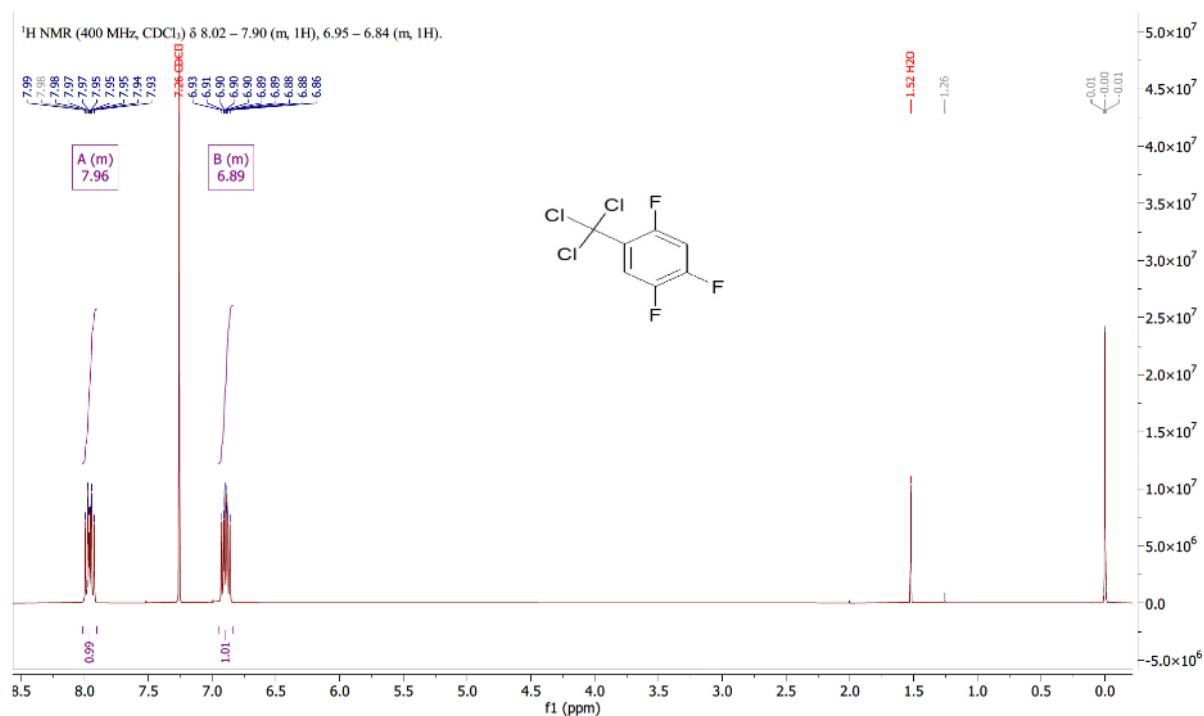

#### Minimized molecular geometry of 1,2,4-trifluoro-5-(trichloromethyl) benzene 2

|    |      |               |               |               |
|----|------|---------------|---------------|---------------|
| C  | 6.0  | -0.6598163040 | 0.7017966144  | 0.0483029887  |
| C  | 6.0  | -0.6668474988 | -0.6918244016 | -0.0230052930 |
| C  | 6.0  | 0.5165238788  | -1.3983746460 | -0.0089928886 |
| C  | 6.0  | 1.7331097942  | -0.7425307998 | 0.0780950968  |
| C  | 6.0  | 1.7801856032  | 0.6359888864  | 0.1485446496  |
| C  | 6.0  | 0.5869203079  | 1.3306992883  | 0.1312000851  |
| C  | 6.0  | -1.9338013976 | 1.5176570699  | 0.0364633752  |
| F  | 9.0  | 0.6536546405  | 2.6715951742  | 0.1966839611  |
| F  | 9.0  | 2.8645963982  | -1.4573774245 | 0.0957561782  |
| F  | 9.0  | 0.4997676080  | -2.7408743520 | -0.0798709980 |
| CL | 17.0 | -3.4130812134 | 0.5054248426  | -0.0560149368 |
| CL | 17.0 | -1.9618206741 | 2.6304154375  | -1.3913575058 |
| H  | 1.0  | 2.7237078629  | 1.1583362470  | 0.2194452725  |
| H  | 1.0  | -1.5910401147 | -1.2419357938 | -0.0972356258 |
| CL | 17.0 | -2.0631588912 | 2.5132038572  | 1.5439856407  |

#### Calculated IR frequencies of 1,2,4-trifluoro-5-(trichloromethyl) benzene 2

| MODE | FREQ (CM <sup>-1</sup> ) | SYMMETRY | RED.MASS  | IR-INTENS. |
|------|--------------------------|----------|-----------|------------|
| 1    | 0.107                    | A        | 16.523539 | 0.000002   |
| 2    | 0.037                    | A        | 16.532725 | 0.000000   |
| 3    | 0.029                    | A        | 16.523375 | 0.000000   |
| 4    | 6.156                    | A        | 18.415185 | 0.000239   |
| 5    | 7.569                    | A        | 16.976449 | 0.000297   |
| 6    | 14.448                   | A        | 17.107063 | 0.000034   |
| 7    | 47.270                   | A        | 18.198394 | 0.002640   |
| 8    | 77.439                   | A        | 14.339517 | 0.001489   |
| 9    | 145.349                  | A        | 20.720868 | 0.004257   |
| 10   | 156.835                  | A        | 19.620832 | 0.003447   |

|    |          |   |           |          |
|----|----------|---|-----------|----------|
| 11 | 208.098  | A | 20.107860 | 0.020603 |
| 12 | 220.350  | A | 13.361590 | 0.037291 |
| 13 | 229.885  | A | 23.202952 | 0.002600 |
| 14 | 263.205  | A | 12.008212 | 0.011212 |
| 15 | 290.317  | A | 21.076397 | 0.008049 |
| 16 | 305.117  | A | 22.180383 | 0.041457 |
| 17 | 312.914  | A | 9.778580  | 0.023584 |
| 18 | 357.765  | A | 15.903112 | 0.120110 |
| 19 | 392.905  | A | 23.830351 | 0.004030 |
| 20 | 437.966  | A | 9.011144  | 0.081197 |
| 21 | 462.445  | A | 13.411208 | 0.021374 |
| 22 | 480.964  | A | 3.422770  | 0.000102 |
| 23 | 560.147  | A | 8.805734  | 0.647318 |
| 24 | 621.172  | A | 7.363373  | 0.607828 |
| 25 | 665.545  | A | 11.336842 | 1.630445 |
| 26 | 698.924  | A | 3.880332  | 0.255976 |
| 27 | 730.971  | A | 9.522468  | 1.586360 |
| 28 | 762.203  | A | 5.743073  | 1.976318 |
| 29 | 769.474  | A | 8.106608  | 1.661931 |
| 30 | 808.106  | A | 9.653390  | 1.402292 |
| 31 | 873.884  | A | 1.634807  | 0.509664 |
| 32 | 893.094  | A | 3.903851  | 0.313284 |
| 33 | 913.758  | A | 1.440124  | 0.418350 |
| 34 | 1122.365 | A | 9.269628  | 2.549735 |
| 35 | 1173.277 | A | 1.694830  | 0.990542 |
| 36 | 1220.197 | A | 6.375300  | 1.477096 |
| 37 | 1246.669 | A | 1.406107  | 0.143286 |
| 38 | 1328.091 | A | 11.938120 | 0.431405 |
| 39 | 1344.661 | A | 7.911319  | 2.523572 |
| 40 | 1447.823 | A | 10.293892 | 1.498455 |
| 41 | 1535.792 | A | 4.314932  | 6.323587 |
| 42 | 1641.731 | A | 9.559775  | 0.857651 |
| 43 | 1663.271 | A | 8.083902  | 1.591551 |
| 44 | 3213.039 | A | 1.092996  | 0.088511 |
| 45 | 3234.944 | A | 1.090183  | 0.167757 |

Molecular geometry for energy calculation of 1,2,4-trifluoro-5-(dichloromethyl) benzene

|   |     |               |               |               |
|---|-----|---------------|---------------|---------------|
| C | 6.0 | -0.6598163040 | 0.7017966144  | 0.0483029887  |
| C | 6.0 | -0.6668474988 | -0.6918244016 | -0.0230052930 |
| C | 6.0 | 0.5165238788  | -1.3983746460 | -0.0089928886 |
| C | 6.0 | 1.7331097942  | -0.7425307998 | 0.0780950968  |
| C | 6.0 | 1.7801856032  | 0.6359888864  | 0.1485446496  |
| C | 6.0 | 0.5869203079  | 1.3306992883  | 0.1312000851  |
| C | 6.0 | -1.9338013976 | 1.5176570699  | 0.0364633752  |
| F | 9.0 | 0.6536546405  | 2.6715951742  | 0.1966839611  |
| F | 9.0 | 2.8645963982  | -1.4573774245 | 0.0957561782  |
| F | 9.0 | 0.4997676080  | -2.7408743520 | -0.0798709980 |

|    |      |               |               |               |
|----|------|---------------|---------------|---------------|
| CL | 17.0 | -3.4130812134 | 0.5054248426  | -0.0560149368 |
| CL | 17.0 | -1.9618206741 | 2.6304154375  | -1.3913575058 |
| H  | 1.0  | 2.7237078629  | 1.1583362470  | 0.2194452725  |
| H  | 1.0  | -1.5910401147 | -1.2419357938 | -0.0972356258 |
| CL | 17.0 | -2.0631588912 | 2.5132038572  | 1.5439856407  |

### Preparation of 1-chloro-4,5-difluoro-2-(trichloromethyl)benzene 3

In a 250 mL four-necked round-bottom flask equipped with reflux condenser, dropping funnel, internal thermometer and mechanical stirrer, 27.4 g of aluminum trichloride were suspended in 100 mL of carbon tetrachloride under nitrogen. This suspension was admixed with 15.3 g of 1-chloro-3,4-difluorobenzene in a gradual manner, such that the reaction mixture was refluxing gently. The resultant HCl gas was introduced into aqueous sodium hydroxide solution. On completion of the addition the mixture was subsequently stirred for 10 min and then cooled down to room temperature. The reaction mixture was discharged onto 300 mL of ice-water and the organic phase was separated off. The organic phase was washed once with 100 mL of water, once with 100 mL of 5% NaHCO<sub>3</sub> solution and a further time with 100 mL of water. The carbon tetrachloride was distilled off and little acetonitrile was added. The desired product (6.0 g) crystallized out of this solution in the form of colorless fine needles.

<sup>1</sup>H NMR (400 MHz, CDCl<sub>3</sub>) δ 8.26 (dd, J = 11.8, 8.1 Hz, 1H), 7.25 – 7.14 (m, 1H).

m.p.: 137°C

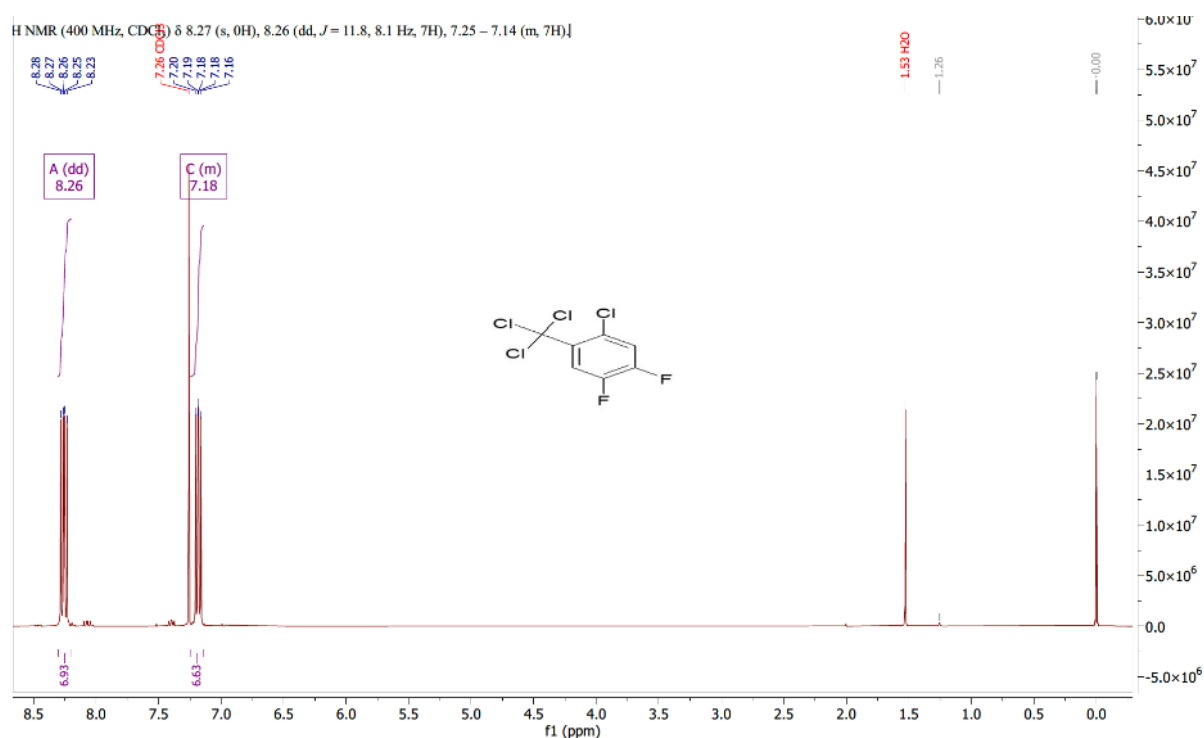

### Minimized molecular geometry of 1-chloro-4,5-difluoro-2-(trichloromethyl)benzene 3

|   |     |               |               |               |
|---|-----|---------------|---------------|---------------|
| C | 6.0 | -0.6440969274 | 0.7366044616  | 0.0498755292  |
| C | 6.0 | -0.6592113639 | -0.6587913998 | -0.0155335275 |
| C | 6.0 | 0.5096005871  | -1.3864771480 | -0.0027987391 |
| C | 6.0 | 1.7327473689  | -0.7470695647 | 0.0748660411  |

|    |      |               |               |               |
|----|------|---------------|---------------|---------------|
| C  | 6.0  | 1.7888983476  | 0.6291040399  | 0.1407149387  |
| C  | 6.0  | 0.6122186062  | 1.3669346485  | 0.1291631084  |
| C  | 6.0  | -1.9565808404 | 1.5069256275  | 0.0321864319  |
| CL | 17.0 | 0.8135477948  | 3.0994081507  | 0.2192846176  |
| F  | 9.0  | 2.8588435589  | -1.4705417864 | 0.0891337048  |
| F  | 9.0  | 0.4690801606  | -2.7269095808 | -0.0667891098 |
| CL | 17.0 | -3.4030120804 | 0.4389394282  | -0.0748144284 |
| CL | 17.0 | -2.0390081690 | 2.6106708148  | -1.3982682435 |
| H  | 1.0  | 2.7493091489  | 1.1205178664  | 0.2005390147  |
| H  | 1.0  | -1.5876013720 | -1.2006647518 | -0.0858335216 |
| CL | 17.0 | -2.1572242198 | 2.4761749839  | 1.5454640637  |

Calculated IR frequencies of 1-chloro-4,5-difluoro-2-(trichloromethyl)benzene 3

| MODE | FREQ (CM <sup>-1</sup> ) | SYMMETRY | RED.MASS  | IR-INTENS. |
|------|--------------------------|----------|-----------|------------|
| 1    | 0.305                    | A        | 17.584685 | 0.000015   |
| 2    | 0.142                    | A        | 17.588211 | 0.000002   |
| 3    | 0.108                    | A        | 17.591800 | 0.000001   |
| 4    | 6.412                    | A        | 18.455359 | 0.000152   |
| 5    | 6.565                    | A        | 18.505651 | 0.000172   |
| 6    | 11.262                   | A        | 20.294330 | 0.000099   |
| 7    | 50.030                   | A        | 25.108722 | 0.002796   |
| 8    | 71.986                   | A        | 12.671222 | 0.000659   |
| 9    | 138.523                  | A        | 21.637932 | 0.003735   |
| 10   | 149.025                  | A        | 26.421890 | 0.006514   |
| 11   | 199.969                  | A        | 23.842821 | 0.014512   |
| 12   | 208.945                  | A        | 12.265066 | 0.025420   |
| 13   | 213.012                  | A        | 27.643655 | 0.003827   |
| 14   | 257.793                  | A        | 10.386737 | 0.000093   |
| 15   | 267.746                  | A        | 20.773967 | 0.012141   |
| 16   | 295.787                  | A        | 19.333977 | 0.011348   |
| 17   | 304.547                  | A        | 11.658400 | 0.040329   |
| 18   | 324.174                  | A        | 18.876171 | 0.060001   |
| 19   | 377.170                  | A        | 19.582584 | 0.033239   |
| 20   | 400.813                  | A        | 25.837265 | 0.012462   |
| 21   | 425.442                  | A        | 10.464706 | 0.031858   |
| 22   | 473.189                  | A        | 3.262719  | 0.007305   |
| 23   | 532.640                  | A        | 8.280816  | 0.377708   |
| 24   | 613.153                  | A        | 8.490430  | 0.774055   |
| 25   | 654.198                  | A        | 12.292762 | 1.259532   |
| 26   | 664.383                  | A        | 8.954516  | 0.664020   |
| 27   | 699.892                  | A        | 4.066503  | 0.276870   |
| 28   | 757.850                  | A        | 6.446050  | 2.321470   |
| 29   | 761.961                  | A        | 9.091095  | 2.274677   |
| 30   | 801.189                  | A        | 9.872140  | 1.463479   |
| 31   | 854.641                  | A        | 6.235400  | 0.557230   |
| 32   | 885.339                  | A        | 1.550300  | 0.165773   |
| 33   | 919.257                  | A        | 1.431192  | 0.437832   |

|    |          |   |          |          |
|----|----------|---|----------|----------|
| 34 | 1026.738 | A | 6.155696 | 0.875047 |
| 35 | 1151.777 | A | 2.228803 | 1.731842 |
| 36 | 1207.538 | A | 4.973060 | 0.682618 |
| 37 | 1259.373 | A | 1.360507 | 0.382054 |
| 38 | 1305.731 | A | 5.281559 | 1.285720 |
| 39 | 1314.915 | A | 7.074188 | 2.112188 |
| 40 | 1409.332 | A | 9.066620 | 1.302556 |
| 41 | 1522.142 | A | 4.231241 | 5.820245 |
| 42 | 1632.643 | A | 9.269506 | 1.695894 |
| 43 | 1648.019 | A | 7.605862 | 0.761770 |
| 44 | 3212.747 | A | 1.092385 | 0.074206 |
| 45 | 3240.474 | A | 1.089578 | 0.213703 |

Molecular geometry for energy calculation of 1-chloro-4,5-difluoro-2-(dichloromethyl)benzene radical

|    |      |               |               |               |
|----|------|---------------|---------------|---------------|
| C  | 6.0  | -0.6440969274 | 0.7366044616  | 0.0498755292  |
| C  | 6.0  | -0.6592113639 | -0.6587913998 | -0.0155335275 |
| C  | 6.0  | 0.5096005871  | -1.3864771480 | -0.0027987391 |
| C  | 6.0  | 1.7327473689  | -0.7470695647 | 0.0748660411  |
| C  | 6.0  | 1.7888983476  | 0.6291040399  | 0.1407149387  |
| C  | 6.0  | 0.6122186062  | 1.3669346485  | 0.1291631084  |
| C  | 6.0  | -1.9565808404 | 1.5069256275  | 0.0321864319  |
| CL | 17.0 | 0.8135477948  | 3.0994081507  | 0.2192846176  |
| F  | 9.0  | 2.8588435589  | -1.4705417864 | 0.0891337048  |
| F  | 9.0  | 0.4690801606  | -2.7269095808 | -0.0667891098 |
| CL | 17.0 | -3.4030120804 | 0.4389394282  | -0.0748144284 |
| H  | 1.0  | 2.7493091489  | 1.1205178664  | 0.2005390147  |
| H  | 1.0  | -1.5876013720 | -1.2006647518 | -0.0858335216 |
| CL | 17.0 | -2.1572242198 | 2.4761749839  | 1.5454640637  |

#### Preparation of 1-bromo-4,5-difluoro-2-(trichloromethyl)benzene 4

In a 250 mL four-necked round-bottom flask equipped with reflux condenser, dropping funnel, internal thermometer and mechanical stirrer, 27.4 g of aluminum trichloride were suspended in 100 mL of carbon tetrachloride under nitrogen. This suspension was admixed with 19.8 g of 1-bromo-3,4-difluorobenzene in a gradual manner, such that the reaction mixture was refluxing gently. The resultant HCl gas was introduced into aqueous sodium hydroxide solution. On completion of the addition the mixture was subsequently stirred for 10 min and then cooled down to room temperature. The reaction mixture was discharged onto 300 mL of ice-water and the organic phase was separated off. The organic phase was washed once with 100 mL of water, once with 100 mL of 5% NaHCO<sub>3</sub> solution and a further time with 100 mL of water. The carbon tetrachloride was distilled off and little acetonitrile was added. The desired product (4.4 g) crystallized out of this solution in the form of colourless fine needles.

<sup>1</sup>H NMR (400 MHz, CDCl<sub>3</sub>) δ 8.34 (dd, J = 12.1, 8.0 Hz, 1H), 7.41 (dd, J = 9.2, 7.5 Hz, 1H).  
m.p.: 135°C

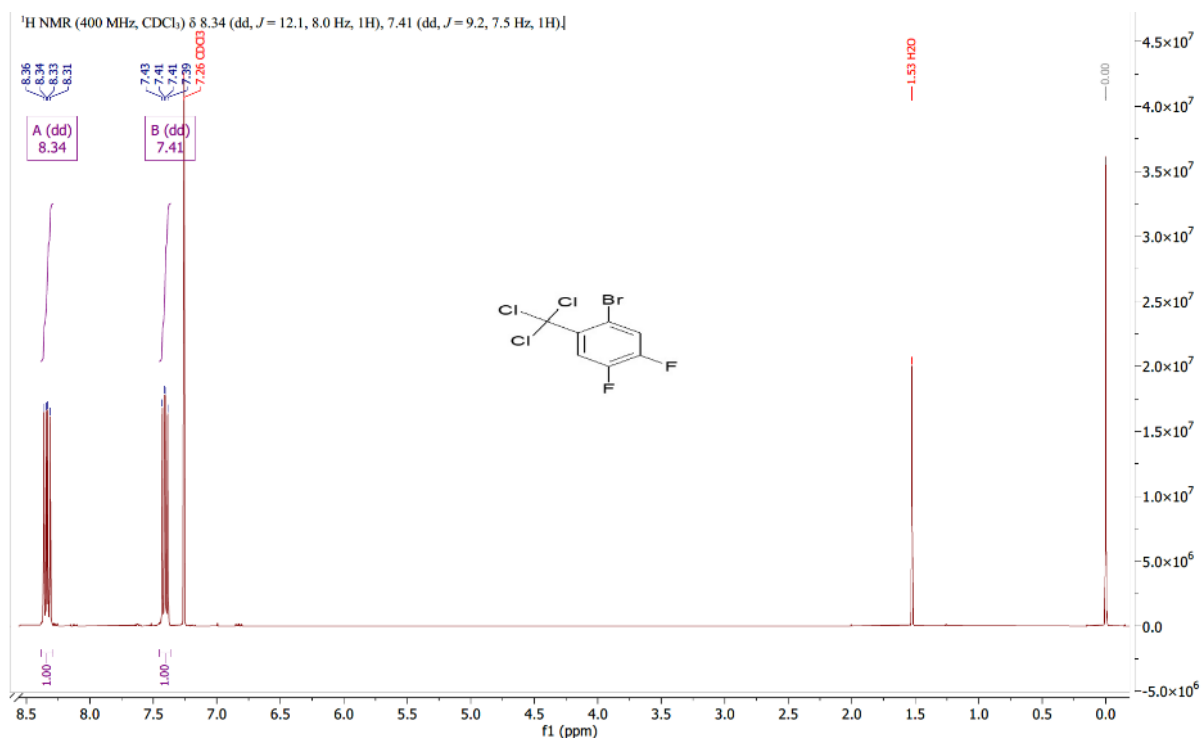

#### Minimized molecular geometry of 1-bromo-4,5-difluoro-2-(trichloromethyl)benzene 4

|    |      |              |                |              |
|----|------|--------------|----------------|--------------|
| C  | 6.0  | 5.5090586955 | -9.0538532085  | 5.4086162345 |
| C  | 6.0  | 5.6945574169 | -7.6787082723  | 5.5386134874 |
| C  | 6.0  | 6.0651948984 | -6.8813874747  | 4.4327966337 |
| C  | 6.0  | 6.2346491106 | -7.5290570757  | 3.2016949500 |
| C  | 6.0  | 6.0484723882 | -8.8924488428  | 3.0761748499 |
| C  | 6.0  | 5.6883477297 | -9.6558290731  | 4.1749436402 |
| C  | 6.0  | 6.2860082761 | -5.3717467551  | 4.5211609845 |
| CL | 17.0 | 6.7627419667 | -4.6331071923  | 2.9502193766 |
| CL | 17.0 | 7.6142268509 | -4.9809639517  | 5.6799181727 |
| CL | 17.0 | 4.7752674986 | -4.5265088778  | 5.0341357260 |
| F  | 9.0  | 5.5190134035 | -10.9796494620 | 4.0376903229 |
| H  | 1.0  | 5.2303157711 | -9.6646449606  | 6.2586597960 |
| BR | 35.0 | 5.4027088823 | -7.0069170888  | 7.3101123541 |
| H  | 1.0  | 6.5102453908 | -6.9780973132  | 2.3140448936 |
| F  | 9.0  | 6.2203917208 | -9.4858804515  | 1.8819185780 |

#### Calculated IR frequencies of 1-bromo-4,5-difluoro-2-(trichloromethyl)benzene 4

| MODE | FREQ(CM <sup>-1</sup> ) | SYMMETRY | RED.MASS  | IR-INTENS. |
|------|-------------------------|----------|-----------|------------|
| 1    | 0.069                   | A        | 20.538839 | 0.000000   |
| 2    | 0.057                   | A        | 20.532727 | 0.000000   |
| 3    | 0.043                   | A        | 20.516871 | 0.000000   |
| 4    | 6.074                   | A        | 19.798685 | 0.000080   |
| 5    | 6.522                   | A        | 20.048751 | 0.000108   |
| 6    | 8.963                   | A        | 24.235545 | 0.000091   |
| 7    | 49.485                  | A        | 30.668805 | 0.002692   |
| 8    | 68.199                  | A        | 11.620253 | 0.000234   |
| 9    | 124.142                 | A        | 21.209641 | 0.003619   |

|    |          |   |           |          |
|----|----------|---|-----------|----------|
| 10 | 127.550  | A | 36.598812 | 0.003195 |
| 11 | 182.234  | A | 29.794406 | 0.012515 |
| 12 | 189.545  | A | 23.762299 | 0.005780 |
| 13 | 205.747  | A | 11.890292 | 0.021203 |
| 14 | 256.522  | A | 9.717761  | 0.002097 |
| 15 | 261.711  | A | 19.309007 | 0.009268 |
| 16 | 272.408  | A | 24.036046 | 0.000491 |
| 17 | 299.714  | A | 17.365476 | 0.008815 |
| 18 | 302.902  | A | 13.176436 | 0.046328 |
| 19 | 333.826  | A | 17.584155 | 0.103837 |
| 20 | 397.780  | A | 28.284970 | 0.003320 |
| 21 | 416.931  | A | 10.759398 | 0.019864 |
| 22 | 468.224  | A | 3.232762  | 0.013915 |
| 23 | 517.321  | A | 8.294286  | 0.309148 |
| 24 | 607.894  | A | 8.693139  | 0.691179 |
| 25 | 636.067  | A | 8.896851  | 0.541520 |
| 26 | 645.474  | A | 12.441113 | 1.049758 |
| 27 | 703.808  | A | 3.735905  | 0.276460 |
| 28 | 756.061  | A | 6.545271  | 2.344221 |
| 29 | 758.394  | A | 9.259975  | 2.108481 |
| 30 | 795.154  | A | 10.193275 | 1.655251 |
| 31 | 836.031  | A | 7.173680  | 0.719125 |
| 32 | 899.015  | A | 1.564614  | 0.194531 |
| 33 | 926.207  | A | 1.460970  | 0.323109 |
| 34 | 1000.713 | A | 5.293174  | 0.511003 |
| 35 | 1148.456 | A | 2.710319  | 2.271551 |
| 36 | 1186.788 | A | 4.071950  | 0.404671 |
| 37 | 1259.739 | A | 1.322076  | 0.390254 |
| 38 | 1297.908 | A | 3.939552  | 2.788777 |
| 39 | 1323.871 | A | 10.837189 | 0.912916 |
| 40 | 1400.315 | A | 8.843441  | 1.335109 |
| 41 | 1520.614 | A | 4.227877  | 5.787432 |
| 42 | 1635.169 | A | 8.868113  | 1.893191 |
| 43 | 1650.598 | A | 7.625075  | 0.718071 |
| 44 | 3214.572 | A | 1.092811  | 0.086718 |
| 45 | 3238.732 | A | 1.090283  | 0.220098 |

Molecular geometry for energy calculation of 1-bromo-4,5-difluoro-2-(dichloromethyl)benzene radical

|    |      |              |               |              |
|----|------|--------------|---------------|--------------|
| C  | 6.0  | 5.5090607588 | -9.0538536825 | 5.4086165669 |
| C  | 6.0  | 5.6945608150 | -7.6787089974 | 5.5386141563 |
| C  | 6.0  | 6.0651969663 | -6.8813877775 | 4.4327971935 |
| C  | 6.0  | 6.2346503517 | -7.5290572526 | 3.2016953857 |
| C  | 6.0  | 6.0484721532 | -8.8924487209 | 3.0761745141 |
| C  | 6.0  | 5.6883466896 | -9.6558288364 | 4.1749431877 |
| C  | 6.0  | 6.2860082327 | -5.3717466920 | 4.5211608824 |
| CL | 17.0 | 6.7627457560 | -4.6331078228 | 2.9502203108 |

|    |      |              |                |              |
|----|------|--------------|----------------|--------------|
| CL | 17.0 | 7.6142237496 | -4.9809605700  | 5.6799203299 |
| F  | 9.0  | 5.5190107491 | -10.9796487306 | 4.0376900649 |
| H  | 1.0  | 5.2303174974 | -9.6646450885  | 6.2586603093 |
| BR | 35.0 | 5.4027085437 | -7.0069171681  | 7.3101122210 |
| H  | 1.0  | 6.5102450603 | -6.9780972901  | 2.3140448617 |
| F  | 9.0  | 6.2203876926 | -9.4858797466  | 1.8819178261 |

## Preparation of Components for the Photopolymer Formulation

### Preparation of Polyol 1

A 1 l flask was initially charged with 0.18 g of tin octoate, 374.8 g of t-caprolactone and 374.8 g of a difunctional polytetrahydrofuran polyether polyol (equivalent weight 500 g/mol OH), which were heated to 120° C. and kept at this temperature until the solids content (proportion of nonvolatile constituents) was 99.5% by weight or higher. Subsequently, the mixture was cooled and the product was obtained as a waxy solid.

### GPC (THF, RI detection, Styrene calibration)

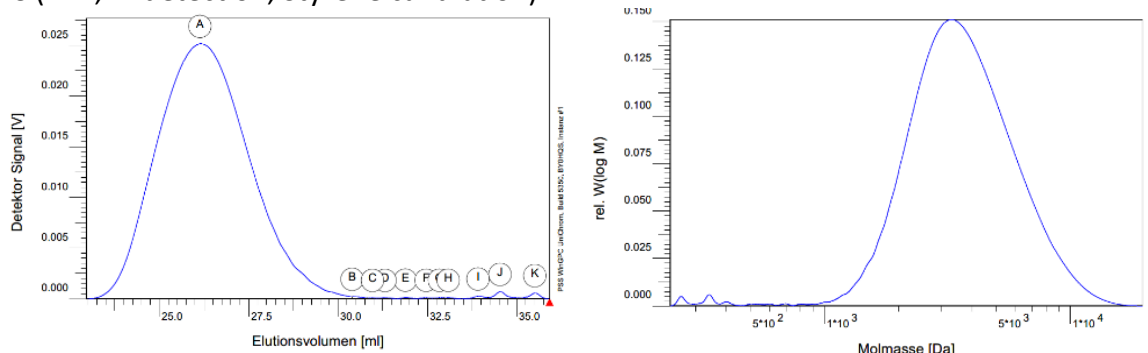

$M_n$ : 3.027 Da;  $M_w$ : 4.020 Da

### Preparation of Phosphorothoyltri(oxybenzene-4,1-diylcarbamoxyethane-2,1-diyl) trisacrylate

A 500 mL round-bottom flask was initially charged with 0.1 g of 2,6-di-tert-butyl-4-methylphenol, 0.05 g of dibutyltin dilaurate and 213.07 g of a 27% solution of tris(p-isocyanatophenyl) thiophosphate in ethyl acetate (Desmodur® RFE), which were heated to 60° C. Subsequently, 42.37 g of 2-hydroxyethyl acrylate were added dropwise and the mixture was still kept at 60° C. until the isocyanate content had fallen below 0.1%. This was followed by cooling and complete removal of the ethyl acetate under reduced pressure. The product was obtained as a semicrystalline solid.

$^1\text{H NMR}$  (600 MHz,  $\text{CDCl}_3$ )  $\delta$  7.38 (d,  $J$  = 8.5 Hz, 6H), 7.21 – 7.11 (m, 6H), 6.96 (s, 3H), 6.45 (dd,  $J$  = 17.3, 1.3 Hz, 3H), 6.15 (ddd,  $J$  = 17.3, 10.5, 6.8 Hz, 3H), 5.87 (dt,  $J$  = 10.5, 2.1 Hz, 3H), 4.41 (s, 12H).



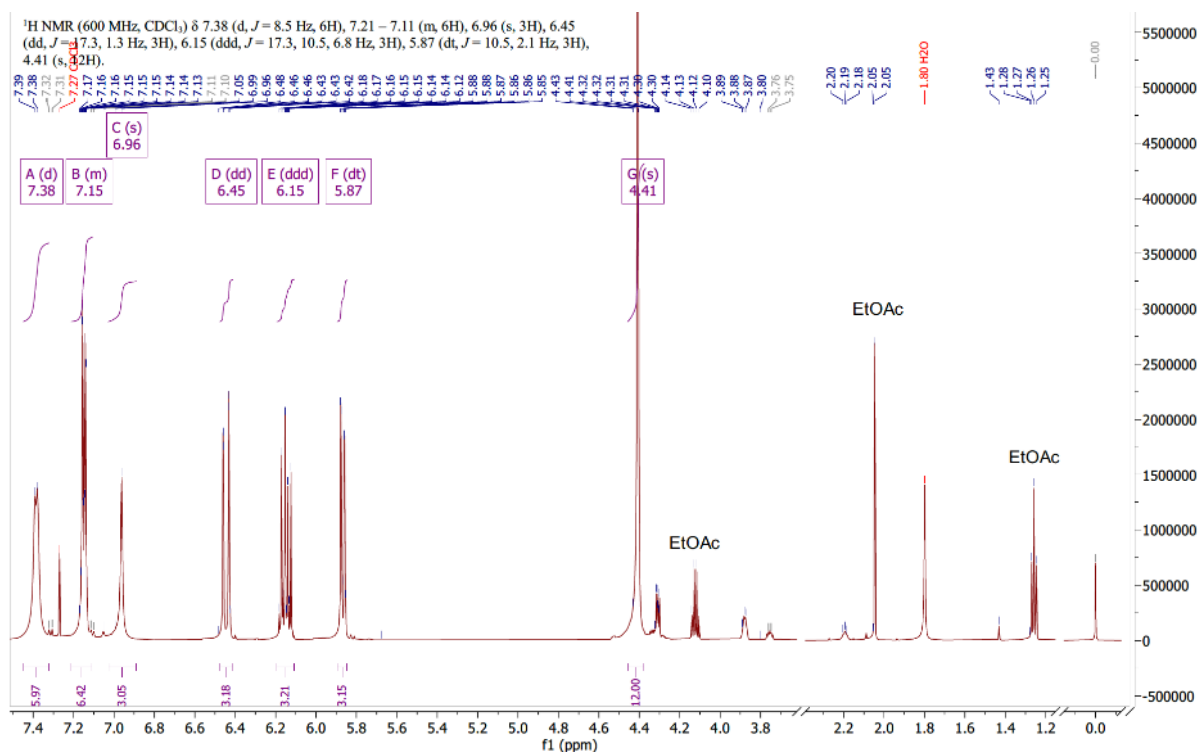

## Preparation of 2-(((3-(Methylsulphonyl)phenyl)-carbamoyl)oxy)ethyl prop-2-enoate

A 100 mL round-bottom flask was initially charged with 0.02 g of 2,6-di-*tert*-butyl-4-methylphenol, 0.01 g of Desmorapid® Z, 11.7 g of 3-(methylthio)phenyl isocyanate [28479-1-8], and the mixture was heated to 60° C. Subsequently, 8.2 g of 2-hydroxyethyl acrylate were added dropwise and the mixture was still kept at 60° C. until the isocyanate content had fallen below 0.1%. This was followed by cooling. The product was obtained as a colorless liquid.

<sup>1</sup>H NMR (600 MHz, Chloroform-*d*) δ 7.37 (s, 1H), 7.20 (t, *J* = 7.9 Hz, 1H), 7.12 – 7.06 (m, 1H), 6.96 (ddd, *J* = 7.8, 1.9, 1.0 Hz, 1H), 6.76 (s, 1H), 6.45 (dd, *J* = 17.3, 1.3 Hz, 1H), 6.16 (dd, *J* = 17.4, 10.5 Hz, 1H), 5.87 (dd, *J* = 10.5, 1.4 Hz, 1H), 4.41 (s, 4H), 2.47 (s, 3H).

m.p. 58 °C

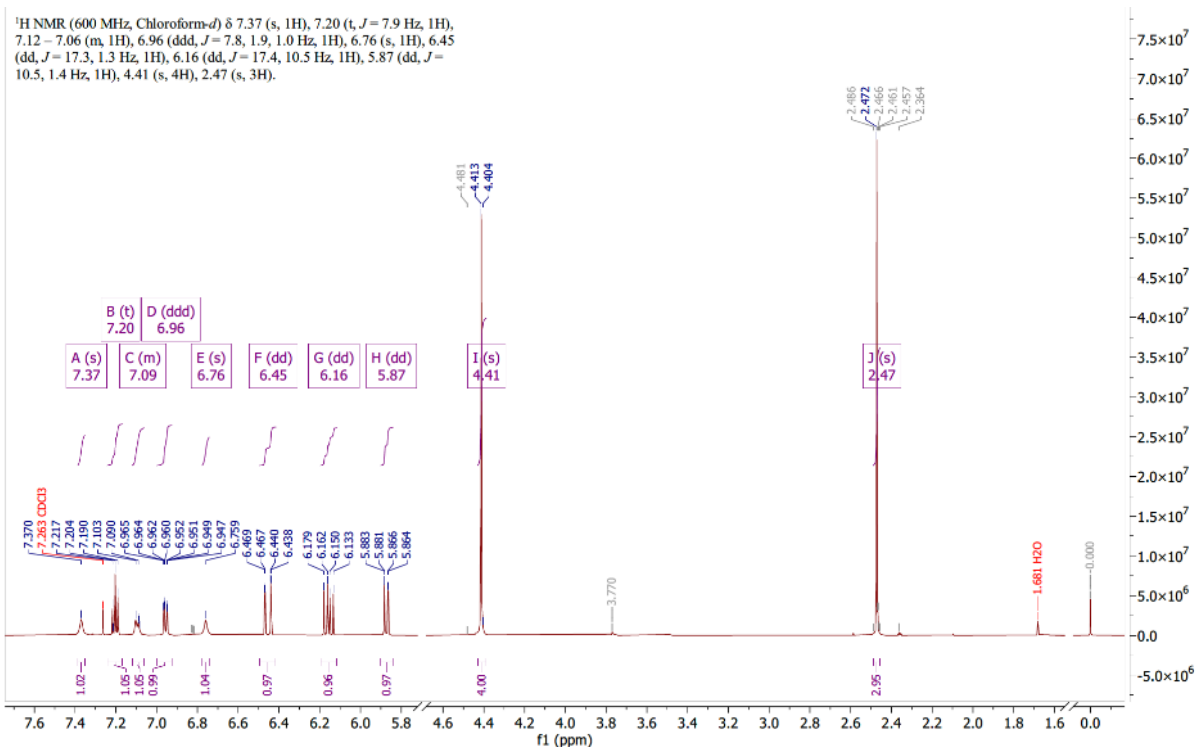

#### Preparation of bis(2,2,3,3,4,4,5,5,6,6,7,7-dodecafluoroheptyl)(2,2,4-trimethylhexane-1,6-diyl)biscarbamate

A 50 mL round-bottom flask was initially charged with 0.02 g of Desmorapid® Z and 3.6 g of 2,4,4-trimethylhexane 1,6-diisocyanate (TMDI), and the mixture was heated to 60° C. Subsequently, 11.9 g of 2,2,3,3,4,4,5,5,6,6,7,7-dodecafluoroheptan-1-ol were added dropwise and the mixture was still kept at 60° C. until the isocyanate content had fallen below 0.1%. This was followed by cooling. The product was obtained as a colorless oil.

<sup>1</sup>H NMR (600 MHz, CDCl<sub>3</sub>) δ 6.05 (s, 2H), 5.43 – 4.86 (m, 2H), 4.59 (qd, *J* = 14.9, 13.3, 9.6 Hz, 4H), 3.41 – 2.83 (m, 4H), 1.78 – 0.74 (m, 15H).

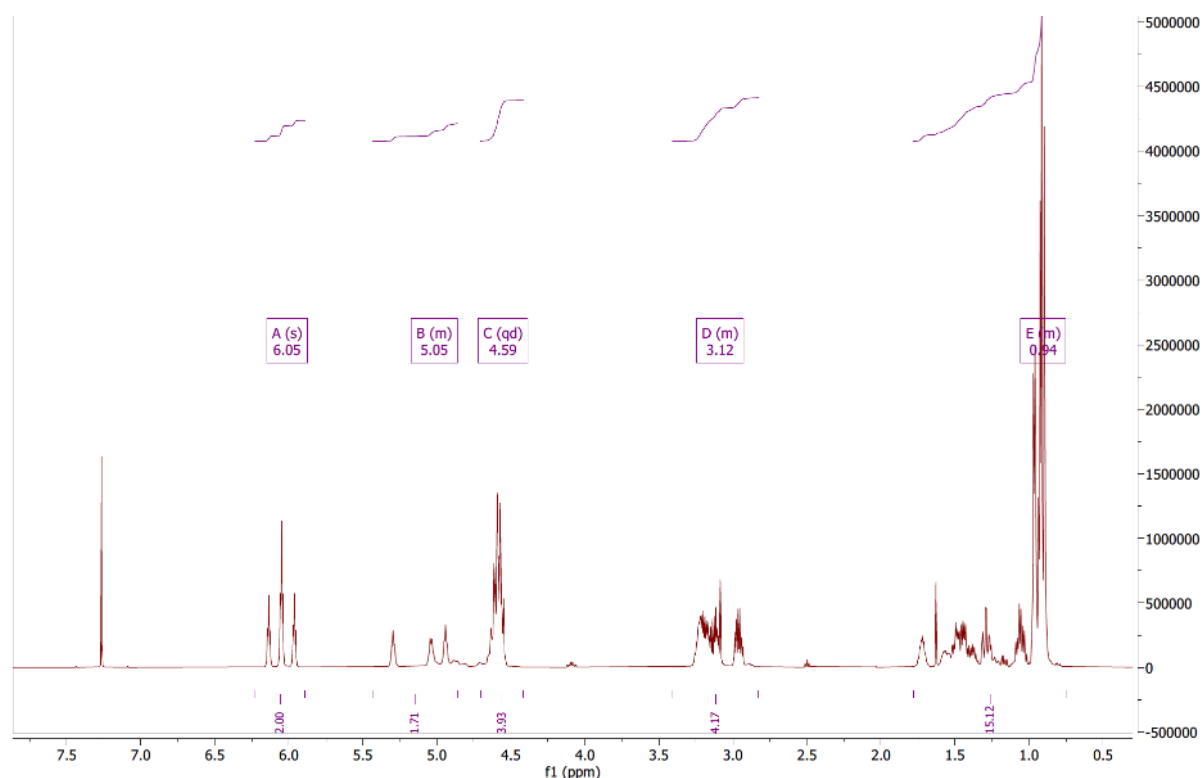

#### Preparation of borate I: Tetrabutylammonium tris(4-fluorophenyl)(hexyl)borate

A solution of 12.5 g of dibromohexylborane\*dimethyl sulphide [64770-04-3] (prepared as described by Brown [2]) in 25 mL of toluene was admixed at 0° C. with 60 mL of a 1.0 M solution of 4-fluorophenylmagnesium bromide [873-77-8] in THF by gradual dropwise addition. The reaction mixture was warmed to room temperature over 30 min and then refluxed for 2 h. Subsequently, the solvent was removed in vacuum and the oily residue was dissolved in 400 mL of methanol/water (4:1) and freed from precipitated solid material by filtration. The solution obtained was admixed with 12.6 g of tetrabutylammonium bromide and the precipitated solid material was isolated by filtration and dried in vacuo. A colorless solid material was obtained in an amount of 10.2 g.

#### Preparation of borate II: Tetrabutylammonium tris(4-chlorophenyl)(hexyl)borate

A solution of 15.4 g of dibromohexylborane\*dimethyl sulphide [64770-04-3] (prepared as described Brown [2]) in 25 mL of toluene was admixed at 0° C with 72 mL of a 0.9 M solution of 4-chlorophenylmagnesium bromide [873-77-8] in THF/toluene by gradual dropwise addition. The reaction mixture was warmed to room temperature over 30 min and then refluxed for 2 h. Subsequently, the solvent was removed in vacuum and the oily residue was dissolved in 400 mL of methanol/water (4:1) and freed from precipitated solid material by filtration. The solution obtained was admixed with 15.6 g of tetrabutylammonium bromide and the precipitated solid material was isolated by filtration and dried in vacuo. A colorless solid material was obtained in an amount of 12.2 g.

#### Preparation of Safranine O bis(2-ethylhexyl)sulphosuccinate

5.07 g of anhydrous sodium bis(2-ethylhexyl)sulphosuccinate [45297-26-5] were dissolved in 50 mL of anhydrous ethyl acetate. 4.00 g of the anhydrous dye Safranine O [10309-89-4],

composition see [1], were added. The mixture was stirred at room temperature for 3 h and filtered through a fluted filter. The solvent was removed in vacuo to leave 5.1 g of the dye Safranin O bis(2-ethylhexyl)sulphosuccinate [1374689-68-5] as highly viscous oil.

#### Media to Determine the Holographic Properties

3.38 g of polyol component 1 were mixed with 0.010 g of substance 1, 2.00 g of 2-([3-(Methylsulphanyl)phenyl]-carbamoyl)oxyethyl prop-2-enoate, 2.00 g of Phosphorothioyltrilethyl (oxybenzene-4,1-diyl)carbamoxyethane-2,1-diyl trisacrylate, 1.50 g of bis(2,2,3,3,4,4,5,5,6,6,7,7-dodecafluoroheptyl)(2,2,4-trimethylhexane-1,6-diyl)biscarbamate, 0.10 g of Tetrabutylammonium tris(4-fluorophenyl)(hexyl)borate, 0.010 g of Safranin O bis(2-ethylhexyl)sulphosuccinate and 0.35 g of N-ethylpyrrolidone at 60° C. to obtain a clear solution. This was followed by cooling to 30° C., admixture of 0.65 g of Desmodur N3900 and renewed mixing. This was finally followed by admixture of 0.01 g of Fomrez UL 28 and renewed brief mixing. The liquid mass obtained was then poured onto a glass plate and covered thereon with a second glass plate. This test specimen was left at room temperature for 12 hours for curing.

*Ab initio* DFT calculation results of the oxidation potential of tri-chloromethyl compounds, a detailed description on the methodology employed is provided by Nicewicz. [3]

| Substance                     | Triazine S      | Triazine A      | 1               | 2               | 3               | 4               |
|-------------------------------|-----------------|-----------------|-----------------|-----------------|-----------------|-----------------|
| E <sub>Radical</sub> / a.u.   | -4535,132859588 | -3462,689943180 | -1749,931643771 | -1948,476550815 | -2308,815946561 | -4422,226861354 |
| E <sub>Neutral</sub> / a.u.   | -4535,012744451 | -3462,567945447 | -1749,809659203 | -1948,354208258 | -2308,692860079 | -4422,095164758 |
| E <sub>Diff</sub> / Kcal/mol) | -75,4           | -76,6           | -76,5           | -76,8           | -77,2           | -82,6           |
| E <sub>ox</sub> / V           | -1,15           | -1,10           | -1,10           | -1,09           | -1,07           | (-0,84)         |
| METHODS EMPLOYED              |                 |                 |                 |                 |                 |                 |
| DFT functional                | B3LYPV1R        | B3LYPV1R        | B3LYPV1R        | B3LYPV1R        | B3LYPV1R        | B3LYPV1R        |
| Basis set                     | KTZVPP          | KTZVPP          | KTZVPP          | KTZVPP          | KTZVPP          | 6-31+G(d,p)     |
| Reaction                      | Isodesmic       | Isodesmic       | Isodesmic       | Isodesmic       | Isodesmic       | Isodesmic       |
|                               |                 |                 |                 |                 |                 |                 |
| E(Chloride) / a.u.            | -460,3970054    | -460,3753284    |                 |                 |                 |                 |
| DFT functional                | B3LYPV1R        | B3LYPV1R        |                 |                 |                 |                 |
| Basis set                     | KTZVPP          | 6-31+G(d,p)     |                 |                 |                 |                 |

E<sub>Diff</sub> is calculated by (E<sub>Radical</sub> – E<sub>Neutral</sub>) \* 627.5 / kcal/mol.

E<sub>ox</sub> is calculated by (E<sub>Diff</sub> / 23.061) – 4.281 – 0.141 / V. [3]

1. Berneth, H.; Rölle, T.; Bruder, F.-K.; Faecke, T.; Weiser, M.-S.; Hoenel, D. Photopolymer formulation for producing holographic media having highly cross-linked matrix polymers. WO2012062655, 2012.
2. Brown, H.C.; Ravindran, N. Direct reaction of dibromoborane-methyl sulfide,  $\text{HBBr}_2 \cdot \text{S}(\text{CH}_3)_2$ , with alkenes. The remarkable reactivity of dibromoborane-methyl sulfide as a hydroborating agent as compared with related dichloroborane derivatives. *Journal of the American Chemical Society* **1977**, 99, 7097-7098, doi:10.1021/ja00463a071.
3. Nicewicz, D.; Roth, H.; Romero, N. Experimental and Calculated Electrochemical Potentials of Common Organic Molecules for Applications to Single-Electron Redox Chemistry. *Synlett* **2015**, 27, 714-723, doi:10.1055/s-0035-1561297.
